# Supplementary material
Source: Springer Nature journal article supplement (https://www.springermedizin.de/resource/supplementary/12913_2010_1611_MOESM5_ESM.pdf/9529404)

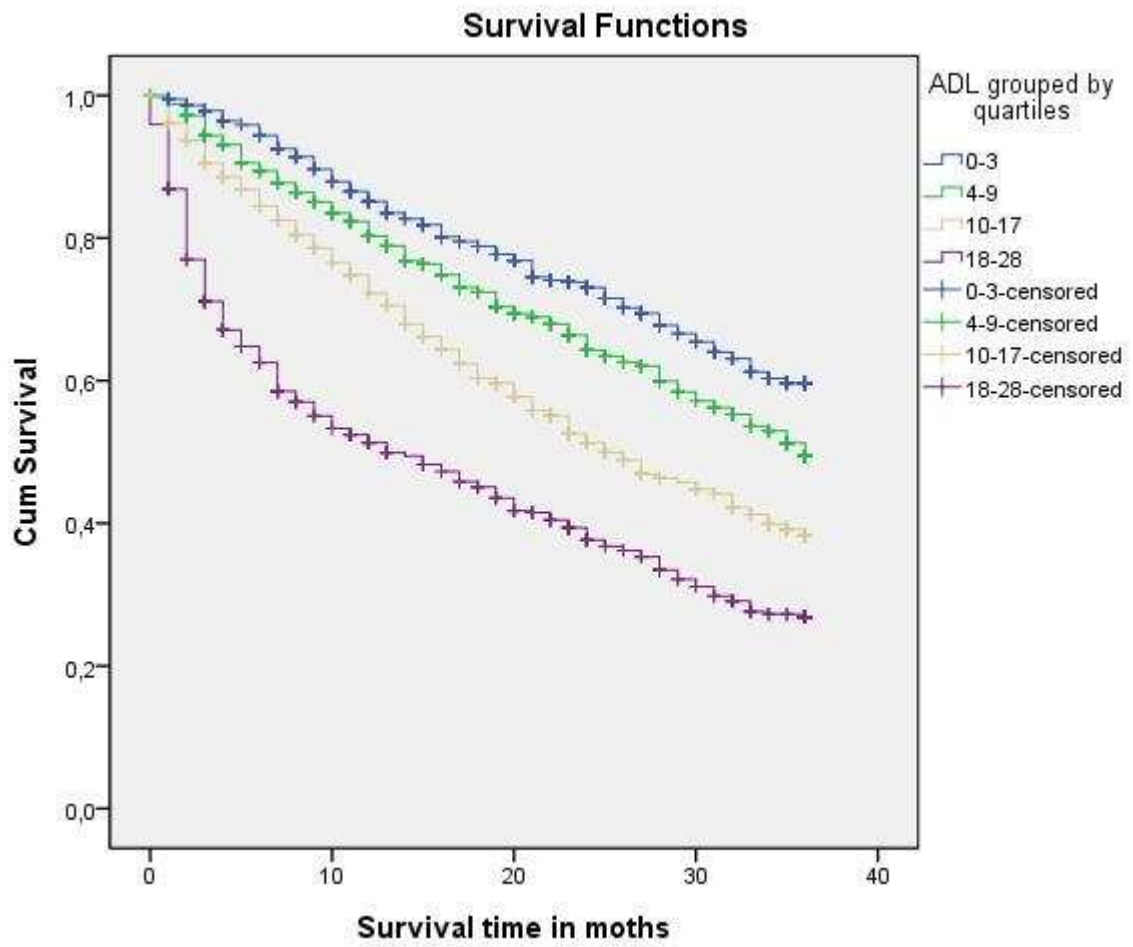

\*Log Rank test <math><0.001</math>

Supplement: MOESM5 [file 9529404]
